# Supplementary material
Source: Research Square preprint supplement (doi:10.21203/rs.3.rs-9063890/v1)
Supplement: Supplementary file 1 [file cd6c075c100f0bcb4f130688.docx]

**Table S1. Predictor Selection Using Penalized Logistic Regression**

| **Variable** | **Coefficient** | **Selected** |
| --- | --- | --- |
| **NIHSS score at admission (ED)** | 0.038 | Yes |
| **Age (years)** | 0.043 | Yes |
| **Sepsis (yes vs no)** | 0.275 | Yes |
| **Glucose at admission (mg/dL)** | 0.036 | Yes |
| **C-reactive protein–to–albumin ratio at admission** | 0.034 | No |
| **Serum albumin (g/dL)** | 0.000 | No |
| **Hypertension** | 0.000 | No |
| **Diabetes mellitus** | 0.000 | No |

Results of least absolute shrinkage and selection operator penalized regression identifying stable predictors of ninety-day mortality while minimizing overfitting. Variables with non-zero coefficients after cross-validation are retained.
